# Supplementary material
Source: ML conference proceedings conference paper supplement (https://proceedings.neurips.cc/paper_files/paper/2018/hash/28dd2c7955ce926456240b2ff0100bde-Abstract.html)
Supplement: Supplementary file [file 28dd2c7955ce926456240b2ff0100bde-Supplemental.zip]

# Supplementary Material for Generalized Inverse Optimization through Online Learning

Chaosheng Dong, Yiran Chen, Bo Zeng

## A Omitted mathematical reformulations

### A.1 Single level reformulation for the Inverse Linear Optimization Problem

When the objective function is linear, namely, the optimization problem has the following form

$$\begin{aligned} \min_{\mathbf{x} \in \mathbb{R}_+^n} \quad & \mathbf{c}^T \mathbf{x} \\ \text{s.t.} \quad & \mathbf{A}\mathbf{x} \geq \mathbf{b}. \end{aligned} \tag{LP}$$

Suppose that the right hand side  $\mathbf{b}$  changes over time  $t$ . That is,  $\mathbf{b} = \mathbf{b}_t$  at time  $t$ . When trying to learn  $\mathbf{c}$ , the single level reformulation the inverse problem is

$$\begin{aligned} \min_{\mathbf{c} \in \Theta} \quad & \frac{1}{2} \|\mathbf{c} - \mathbf{c}_t\|_2^2 + \eta_t \|\mathbf{y}_t - \mathbf{x}\|_2^2 \\ \text{s.t.} \quad & \mathbf{A}\mathbf{x} \geq \mathbf{b}_t, \mathbf{x} \geq \mathbf{0}, \\ & \mathbf{A}^T \mathbf{u} \leq \mathbf{c}, \\ & \mathbf{x} \leq M_1 \mathbf{z}_1, \\ & \mathbf{c} - \mathbf{A}^T \mathbf{u} \leq M_1 (1 - \mathbf{z}_1), \\ & \mathbf{u} \leq M_2 \mathbf{z}_2, \\ & \mathbf{A}\mathbf{x} - \mathbf{b}_t \leq M_2 (1 - \mathbf{z}_2), \\ & \mathbf{x} \in \mathbb{R}_+^n, \mathbf{u} \in \mathbb{R}_+^m, \mathbf{z}_1 \in \{0, 1\}^n, \mathbf{z}_2 \in \{0, 1\}^m, \end{aligned}$$

where  $M_1$  and  $M_2$  are appropriate numbers used to bound  $\mathbf{x}$  and  $\mathbf{c} - \mathbf{A}^T \mathbf{u}$ ,  $\mathbf{u}$  and  $\mathbf{A}\mathbf{x} - \mathbf{b}_t$  respectively.

We have a similar single level reformulation when learning the Right-hand side  $\mathbf{b}$ . Clearly, this is a Mixed Integer Second Order Cone program(MISOCP) when learning either  $\mathbf{c}$  or  $\mathbf{b}$ .

### A.2 Single level reformulation for the Inverse Quadratic Optimization Problem

When the objective functions are quadratic, namely, the optimization problem has the following form

$$\begin{aligned} \min_{\mathbf{x} \in \mathbb{R}^n} \quad & \frac{1}{2} \mathbf{x}^T Q \mathbf{x} + \mathbf{c}^T \mathbf{x} \\ \text{s.t.} \quad & \mathbf{A}\mathbf{x} \geq \mathbf{b}. \end{aligned} \tag{QP}$$

Suppose that  $\mathbf{c}$  changes over time  $t$ . That is,  $\mathbf{c} = \mathbf{c}_t$  at time  $t$ . When trying to learn  $\mathbf{b}$ , the single level reformulation for the inverse problem is

$$\begin{aligned} \min_{\mathbf{b} \in \Theta} \quad & \frac{1}{2} \|\mathbf{b} - \mathbf{b}_t\|_2^2 + \eta_t \|\mathbf{y}_t - \mathbf{x}\|_2^2 \\ \text{s.t.} \quad & \mathbf{A}\mathbf{x} \geq \mathbf{b}, \\ & \mathbf{u} \leq M \mathbf{z}, \\ & \mathbf{A}\mathbf{x} - \mathbf{b} \leq M (1 - \mathbf{z}), \\ & Q\mathbf{x} + \mathbf{c}_t - \mathbf{A}^T \mathbf{u} = 0, \\ & \mathbf{b} \in \mathbb{R}^m, \mathbf{x} \in \mathbb{R}^n, \mathbf{u} \in \mathbb{R}_+^m, \mathbf{z} \in \{0, 1\}^m, \end{aligned}$$

where  $M$  is an appropriate number used to bound  $\mathbf{u}$  and  $\mathbf{A}\mathbf{x} - \mathbf{b}$ .

We have a similar single level reformulation when learning the objective  $\mathbf{c}$ . Clearly, this is a Mixed Integer Second Order Cone program(MISOCP) when learning either  $\mathbf{c}$  or  $\mathbf{b}$ .

## B Omitted Proofs

### B.1 Proof of Lemma 3.1

*Proof.* By Assumption 3.1(b), we know that  $S(u, \theta)$  is a single-valued set for each  $u \in \mathcal{U}$ .

$\forall \mathbf{y} \in \mathcal{Y}, \forall u \in \mathcal{U}, \forall \theta_1, \theta_2 \in \Theta$ , without of loss of generality, let  $l(\mathbf{y}, u, \theta_1) \geq l(\mathbf{y}, u, \theta_2)$ . Then,

$$\begin{aligned} |l(\mathbf{y}, u, \theta_1) - l(\mathbf{y}, u, \theta_2)| &= l(\mathbf{y}, u, \theta_1) - l(\mathbf{y}, u, \theta_2) \\ &= \|\mathbf{y} - S(u, \theta_1)\|_2^2 - \|\mathbf{y} - S(u, \theta_2)\|_2^2 \\ &= \langle S(u, \theta_2) - S(u, \theta_1), 2\mathbf{y} - S(u, \theta_1) - S(u, \theta_2) \rangle \\ &\leq 2(B + R)\|S(u, \theta_2) - S(u, \theta_1)\|_2. \end{aligned} \quad (1)$$

The last inequality is due to Cauchy-Schwartz inequality and the Assumptions 3.1(a), that is

$$\|2\mathbf{y} - S(u, \theta_1) - S(u, \theta_2)\|_2 \leq 2(B + R). \quad (2)$$

Next, we will apply Proposition 6.1 in Bonnans and Shapiro [1998] to bound  $\|S(u, \theta_2) - S(u, \theta_1)\|_2$ .

Under Assumptions 3.1 - 3.2, the conditions of Proposition 6.1 in Bonnans and Shapiro [1998] are satisfied. Therefore,

$$\|S(u, \theta_2) - S(u, \theta_1)\|_2 \leq \frac{2\kappa}{\lambda}\|\theta_1 - \theta_2\|_2. \quad (3)$$

Plugging (2) and (3) in (1) yields the claim.  $\square$

### B.2 Proof of Theorem 3.2

*Proof.* we will use Theorem 3.2 in Kulis and Bartlett [2010] to prove our theorem.

Let  $G_t(\theta) = \frac{1}{2}\|\theta - \theta_t\|_2^2 + \eta_t l(\mathbf{y}_t, u_t, \theta)$ .

We will now show the loss function is convex. The first step is to show that if Assumption 3.3 holds, then the loss function  $l(\mathbf{y}, u, \theta)$  is convex in  $\theta$ .  $\forall \mathbf{y} \in \mathcal{Y}, \forall u \in \mathcal{U}, \forall \theta_1, \theta_2 \in \Theta$ , we have

$$\begin{aligned} &\alpha l(\mathbf{y}, u, \theta_1) + \beta l(\mathbf{y}, u, \theta_2) - l(\mathbf{y}, u, \alpha\theta_1 + \beta\theta_2) \\ &= \alpha\|\mathbf{y} - S(u, \theta_1)\|_2^2 + \beta\|\mathbf{y} - S(u, \theta_2)\|_2^2 - \|\mathbf{y} - S(u, \alpha\theta_1 + \beta\theta_2)\|_2^2 \\ &= \alpha\|\mathbf{y} - S(u, \theta_1)\|_2^2 + \beta\|\mathbf{y} - S(u, \theta_2)\|_2^2 - \|\mathbf{y} - \alpha S(u, \theta_1) - \beta S(u, \theta_2)\|_2^2 \\ &\quad + \|\mathbf{y} - \alpha S(u, \theta_1) - \beta S(u, \theta_2)\|_2^2 - \|\mathbf{y} - S(u, \alpha\theta_1 + \beta\theta_2)\|_2^2 \\ &= \alpha\beta\|S(u, \theta_1) - S(u, \theta_2)\|_2^2 + \|\mathbf{y} - \alpha S(u, \theta_1) - \beta S(u, \theta_2)\|_2^2 - \|\mathbf{y} - S(u, \alpha\theta_1 + \beta\theta_2)\|_2^2 \\ &= \alpha\beta\|S(u, \theta_1) - S(u, \theta_2)\|_2^2 \\ &\quad - \langle \alpha S(u, \theta_1) + \beta S(u, \theta_2) - S(u, \alpha\theta_1 + \beta\theta_2), 2\mathbf{y} - S(u, \alpha\theta_1 + \beta\theta_2) - \alpha S(u, \theta_1) - \beta S(u, \theta_2) \rangle \\ &\geq \alpha\beta\|S(u, \theta_1) - S(u, \theta_2)\|_2^2 - \|\alpha S(u, \theta_1) + \beta S(u, \theta_2) - S(u, \alpha\theta_1 + \beta\theta_2)\|_2 \|2\mathbf{y} - S(u, \alpha\theta_1 + \beta\theta_2) - \alpha S(u, \theta_1) - \beta S(u, \theta_2)\|_2 \\ &\quad + \beta S(u, \theta_2) - \alpha S(u, \theta_1) - \beta S(u, \theta_2)\|_2. \end{aligned} \quad (4)$$

The last inequality is by Cauchy-Schwartz inequality. Note that

$$\begin{aligned} &\|\alpha S(u, \theta_1) + \beta S(u, \theta_2) - S(u, \alpha\theta_1 + \beta\theta_2)\|_2 \|2\mathbf{y} - S(u, \alpha\theta_1 + \beta\theta_2) - \alpha S(u, \theta_1) - \beta S(u, \theta_2)\|_2 \\ &\leq 2(B + R)\|\alpha S(u, \theta_1) + \beta S(u, \theta_2) - S(u, \alpha\theta_1 + \beta\theta_2)\|_2 \\ &\leq \alpha\beta\|S(u, \theta_1) - S(u, \theta_2)\|_2 \quad (\text{By Assumption 3.3}). \end{aligned} \quad (5)$$

Plugging (5) in (4) yields the result.

Using Theorem 3.2 in Kulis and Bartlett [2010], for  $\alpha_t \leq \frac{G_t(\theta_{t+1})}{G_t(\theta_t)}$ , we have

$$R_T \leq \sum_{t=1}^T \frac{1}{\eta_t} (1 - \alpha_t) \eta_t l(\mathbf{y}_t, u_t, \theta_t) + \frac{1}{2\eta_t} (\|\theta_t - \theta^*\|_2^2 - \|\theta_{t+1} - \theta^*\|_2^2). \quad (6)$$

Notice that

$$\begin{aligned} G_t(\theta_t) - G_t(\theta_{t+1}) &= \eta_t(l(\mathbf{y}_t, u_t, \theta_t) - l(\mathbf{y}_t, u_t, \theta_{t+1})) - \frac{1}{2}\|\theta_t - \theta_{t+1}\|_2^2 \\ &\leq \frac{4(B+R)\kappa\eta_t}{\lambda}\|\theta_t - \theta_{t+1}\|_2 - \frac{1}{2}\|\theta_t - \theta_{t+1}\|_2^2 \\ &\leq \frac{8(B+R)^2\kappa^2\eta_t^2}{\lambda^2}. \end{aligned} \quad (7)$$

The first inequality follows by applying Lemma 3.1.

Let  $\alpha_t = \frac{G_t(\theta_{t+1})}{G_t(\theta_t)}$ . Using (7), we have

$$(1 - \alpha_t)\eta_t l(\mathbf{y}_t, u_t, \theta_t) = (1 - \alpha_t)G_t(\theta_t) = G_t(\theta_t) - G_t(\theta_{t+1}) \leq \frac{8(B+R)^2\kappa^2\eta_t^2}{\lambda^2}. \quad (8)$$

Plug (8) in (6), and note the telescoping sum,

$$R_T \leq \sum_{t=1}^T \frac{8(B+R)^2\kappa^2\eta_t}{\lambda^2} + \sum_{t=1}^T \frac{1}{2\eta_t} (\|\theta_t - \theta^*\|_2^2 - \|\theta_{t+1} - \theta^*\|_2^2).$$

Setting  $\eta_t = \frac{D\lambda}{2(B+R)\kappa\sqrt{2t}}$ , we can upper bound the second summation by  $\frac{4\sqrt{2}(B+R)D\kappa}{\lambda}\sqrt{T}$  since  $\|\theta_1 - \theta^*\|_2 \leq 2D$ ,  $\sqrt{t} \leq \sqrt{T}$ , and then the sum telescopes. The first sum simplifies using  $\sum_{t=1}^T \frac{1}{\sqrt{t}} \leq 2\sqrt{T} - 1$  to obtain the result

$$R_T \leq \frac{8\sqrt{2}(B+R)D\kappa}{\lambda}\sqrt{T}.$$

Note that choosing  $\eta_t = \frac{1}{\sqrt{t}}$  also yields  $\mathcal{O}(\sqrt{T})$  regret, but the result above is tighter.  $\square$

### B.3 Proof of Theorem 3.3

*Proof.* Since  $f(\mathbf{x}, u, \theta)$  is strongly convex in  $\mathbf{x}$  on  $\mathbb{R}^n$  by Assumption 3.1, it is also strictly convex in  $\mathbf{x}$  on  $\mathbb{R}^n$ . Then, all the conditions required in Theorem 3. of Aswani et al. [2018] are naturally satisfied under our assumptions. Applying that theorem yields

$$\frac{1}{T} \sum_{t \in [T]} l(\mathbf{y}_t, u_t, \theta^T) \xrightarrow{p} \mathbb{E}[l(\mathbf{y}, u, \theta^*)], \quad (9)$$

where  $\theta^T = \arg \min_{\theta \in \Theta} \{ \sum_{t \in [T]} l(\mathbf{y}_t, u_t, \theta) \}$  is the estimation of the parameter in batch setting.

From Theorem 3.2 we have

$$\frac{1}{T} \sum_{t \in [T]} l(\mathbf{y}_t, u_t, \theta_t) - \frac{1}{T} \sum_{t \in [T]} l(\mathbf{y}_t, u_t, \theta^T) \leq \frac{8\sqrt{2}(B+R)D\kappa}{\lambda\sqrt{T}} \xrightarrow{p} 0. \quad (10)$$

Adding (9) and (10) up, we have the risk consistency result

$$\frac{1}{T} \sum_{t \in [T]} l(\mathbf{y}_t, u_t, \theta_t) \xrightarrow{p} \mathbb{E}[l(\mathbf{y}, u, \theta^*)].$$

$\square$

### B.4 Proof of Corollary 3.3.1

*Proof.* Note that  $\forall \theta \in \Theta$ ,

$$\mathbb{E}[l(\mathbf{y}, u, \theta)] = \mathbb{E} \left[ \min_{\tilde{\mathbf{x}} \in S(u, \theta)} \|\mathbf{x} + \epsilon - \tilde{\mathbf{x}}\|_2^2 \right] = \mathbb{E} \left[ \min_{\tilde{\mathbf{x}} \in S(u, \theta)} \|\mathbf{x} - \tilde{\mathbf{x}}\|_2^2 \right] + \mathbb{E}[\epsilon^T \epsilon] \geq \mathbb{E}[\epsilon^T \epsilon].$$

We further notice that  $\mathbb{E}[\min_{\tilde{\mathbf{x}} \in S(u, \theta_0)} \|\mathbf{x} - \tilde{\mathbf{x}}\|_2^2] = 0$ , since  $\mathbf{x} \in S(u, \theta_0)$ . Therefore, we have

$$\mathbb{E}[l(\mathbf{y}, u, \theta^*)] = \mathbb{E}[l(\mathbf{y}, u, \theta_0)] = \mathbb{E}[\epsilon^T \epsilon].$$

Then, applying Theorem 3.3 yields the result, since we have shown  $\mathbb{E}[l(\mathbf{y}, u, \theta^*)] = \mathbb{E}[\epsilon^T \epsilon]$ .  $\square$

## C Omitted Examples

### C.1 Examples for which Assumption 3.3 holds

Consider for example the following quadratic program

$$\begin{aligned} \min_{\mathbf{x} \in \mathbb{R}^n} \quad & \frac{1}{2} \mathbf{x}^T Q \mathbf{x} + (\mathbf{c} + u)^T \mathbf{x} \\ \text{s.t.} \quad & A \mathbf{x} \geq \mathbf{b}. \end{aligned}$$

where  $Q$  is a positive semidefinite matrix, and  $u$  is the external signal.

Suppose that the parameter we seek to learn is  $\mathbf{c}$ , all the others are given. If for each  $u \in \mathcal{U}$ , the optimal solution for the above program is in the interior of the feasible region, which essentially occurs when the external signal  $u$  does not has a large range for the constrained QP. Then,

$$S(u, \mathbf{c}_1) = -Q^{-1}(\mathbf{c}_1 + u); \quad S(u, \mathbf{c}_2) = -Q^{-1}(\mathbf{c}_2 + u); \quad S(u, \alpha \mathbf{c}_1 + \beta \mathbf{c}_2) = -Q^{-1}(\alpha \mathbf{c}_1 + \beta \mathbf{c}_2 + u);$$

Then, we have

$$0 = \|\alpha S(u, \mathbf{c}_1) + \beta S(u, \mathbf{c}_2) - S(u, \alpha \mathbf{c}_1 + \beta \mathbf{c}_2)\|_2 \leq \alpha \beta \|S(u, \theta_1) - S(u, \theta_2)\|_2 / (2(B + R)).$$

## D Data for the applications

### D.1 Data for learning the consumer behavior

Table 1: True  $\mathbf{r}$

|       |       |       |       |       |       |       |       |       |       |
|-------|-------|-------|-------|-------|-------|-------|-------|-------|-------|
| 1.180 | 1.733 | 1.564 | 0.040 | 2.443 | 1.055 | 4.760 | 5.000 | 1.258 | 4.933 |
|-------|-------|-------|-------|-------|-------|-------|-------|-------|-------|

Table 2: True  $Q$

|       |       |       |        |       |       |       |       |       |       |
|-------|-------|-------|--------|-------|-------|-------|-------|-------|-------|
| 2.360 | 0     | 0     | 0      | 0     | 0     | 0     | 0     | 0     | 0     |
| 0     | 3.465 | 0     | 0      | 0     | 0     | 0     | 0     | 0     | 0     |
| 0     | 0     | 3.127 | 0      | 0     | 0     | 0     | 0     | 0     | 0     |
| 0     | 0     | 0     | 0.0791 | 0     | 0     | 0     | 0     | 0     | 0     |
| 0     | 0     | 0     | 0      | 4.886 | 0     | 0     | 0     | 0     | 0     |
| 0     | 0     | 0     | 0      | 0     | 2.110 | 0     | 0     | 0     | 0     |
| 0     | 0     | 0     | 0      | 0     | 0     | 9.519 | 0     | 0     | 0     |
| 0     | 0     | 0     | 0      | 0     | 0     | 0     | 9.999 | 0     | 0     |
| 0     | 0     | 0     | 0      | 0     | 0     | 0     | 0     | 2.517 | 0     |
| 0     | 0     | 0     | 0      | 0     | 0     | 0     | 0     | 0     | 9.867 |

### D.2 Data for learning the transportation cost

We let  $\lambda_1 = 2$ ,  $\lambda_2 = 10$ ,  $u_e = 1.3$  for all  $e \in E$ ,  $y_1 = 3$  and  $y_2 = 1.5$ .

Table 3: True transportation cost for each edge

|          |          |          |          |          |          |
|----------|----------|----------|----------|----------|----------|
| $c_{13}$ | $c_{14}$ | $c_{23}$ | $c_{25}$ | $c_{34}$ | $c_{35}$ |
| 3.124    | 4.119    | 3.814    | 1.071    | 5.398    | 2.899    |

## References

A. Aswani, Z.-J. Shen, and A. Siddiq. Inverse optimization with noisy data. *Operations Research*, 2018.

- J. F. Bonnans and A. Shapiro. Optimization problems with perturbations: A guided tour. *SIAM Review*, 40(2):228–264, 1998.
- B. Kulis and P. L. Bartlett. Implicit online learning. In *Proceedings of the 27th International Conference on Machine Learning (ICML-10)*, pages 575–582, 2010.
